# Supplementary material for: UV-vis-NIR and EPR characterisation of the redox series [MQ3]2+,+,0,−,2−, M = Ru or Os, and Q = o-quinone derivative
Source: Royal Society of Chemistry journal article supplement (doi:10.1039/c2dt30846k), 2012-01-01

**UV-vis-NIR and EPR characterisation of the redox series  $[\text{MQ}_3]^{2+,+,0,-,2-}$ , M  
= Ru or Os, and Q = *o*-quinone derivative**

**Atanu Kumar Das, Ralph Hübner, Biprajit Sarkar, Jan Fiedler, Stanislav Zálíš,  
Goutam Kumar Lahiri, Wolfgang Kaim\***

**Supporting Information**

**Table S1** Comparison of selected symmetry-averaged<sup>a</sup> bond lengths (Å) and angles (deg) of *cis-1*, *trans-1*, and *trans-2* with G03/PBEO calculation results.

|         | <i>cis-1</i> |       | <i>trans-1</i> |       | <i>trans-2</i> |       |
|---------|--------------|-------|----------------|-------|----------------|-------|
|         | exp.         | calc. | exp.           | calc. | exp.           | calc. |
| M-O1    | 1.973        | 1.983 | 1.978          | 1.983 | 1.966          | 1.974 |
| M-O2    | 1.972        | 1.981 | 1.959          | 1.981 | 1.950          | 1.971 |
| O1-C1   | 1.326        | 1.300 | 1.290          | 1.300 | 1.323          | 1.319 |
| O2-C2   | 1.313        | 1.300 | 1.316          | 1.300 | 1.336          | 1.320 |
| C1-C2   | 1.417        | 1.433 | 1.453          | 1.433 | 1.406          | 1.416 |
| C2-C3   | 1.426        | 1.418 | 1.410          | 1.418 | 1.413          | 1.409 |
| C3-C4   | 1.382        | 1.379 | 1.360          | 1.379 | 1.373          | 1.385 |
| C4-C5   | 1.426        | 1.425 | 1.456          | 1.425 | 1.423          | 1.417 |
| C5-C6   | 1.382        | 1.380 | 1.373          | 1.380 | 1.370          | 1.386 |
| C1-C6   | 1.405        | 1.408 | 1.393          | 1.408 | 1.396          | 1.400 |
| O1-M-O2 | 80.9         | 80.1  | 81.3           | 80.0  | 80.2           | 79.3  |
| O1-M-O3 | 89.0         | 92.4  | 98.9           | 96.2  | 98.7           | 100.9 |
| O1-M-O4 | 170.0        | 168.9 | 99.3           | 92.4  | 99.2           | 91.2  |
| O1-M-O5 | 96.2         | 92.3  | 92.5           | 92.4  | 92.9           | 90.7  |
| O1-M-O6 | 105.4        | 96.2  | 172.5          | 168.9 | 171.9          | 164.0 |
| O2-M-O4 | 99.6         | 92.3  | 176.5          | 168.8 | 174.6          | 164.9 |
| O2-M-O5 | 170.5        | 168.8 | 96.2           | 96.3  | 96.8           | 91.3  |
| O3-M-O5 | 91.9         | 92.4  | 164.9          | 168.8 | 165.1          | 164.4 |

<sup>a</sup> Experimental data from ref. 5.

**Table S2** Bond angles (in deg) in compound **4** (see Figure 1)

---

|              |            |
|--------------|------------|
| N1 – Os – N2 | 156.45(10) |
| O1 – Os – O3 | 174.11(8)  |
| O2 – Os – N3 | 175.27(10) |
| N1 – Os – O1 | 79.75(10)  |
| N2 – Os – O2 | 76.89(10)  |
| N3 – Os – O3 | 78.75(9)   |
| O3 – Os – N2 | 93.19(9)   |
| O2 – Os – N1 | 81.64(10)  |
| N1 – Os – N3 | 102.90(11) |
| O1 – Os – N3 | 95.59(9)   |
| O1 – Os – N2 | 79.75(10)  |
| O1 – Os – O2 | 86.44(9)   |
| O2 – Os – N1 | 81.63(10)  |
| O3 – Os – N1 | 95.53(8)   |
| N2 – Os – N3 | 98.83(11)  |

---

**Figure S1.** Cyclic voltammograms of **1**, **2** and **4** in CH<sub>2</sub>Cl<sub>2</sub>/0.1 M Bu<sub>4</sub>NPF<sub>6</sub>.

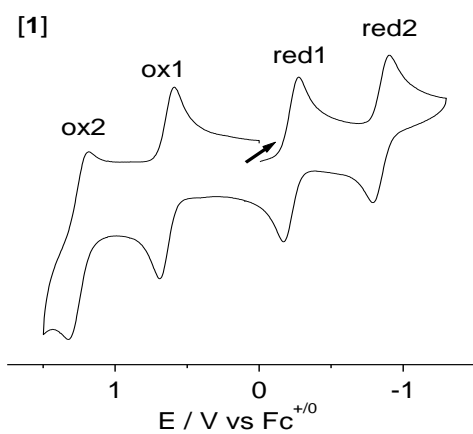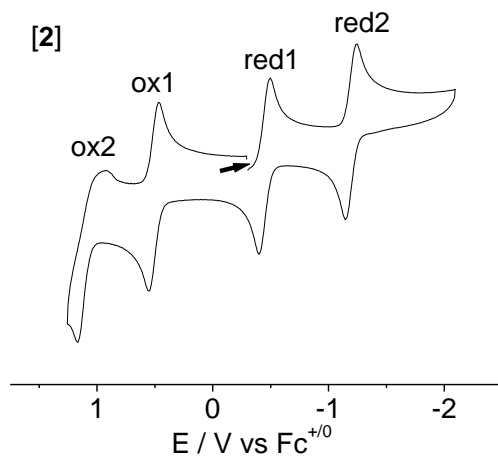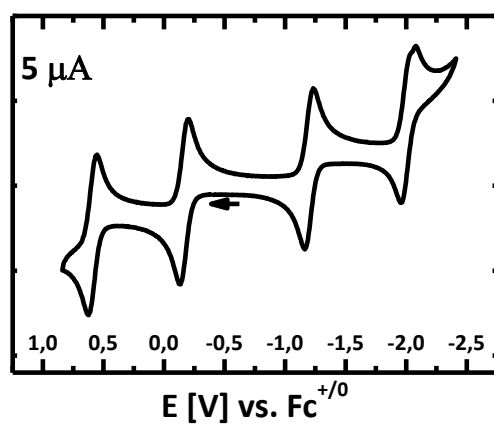

**Figure S2.** X band EPR spectrum of electrochemically generated  $2^+$  at 110 K in  $\text{CH}_2\text{Cl}_2/0.1$   
M  $\text{Bu}_4\text{NPF}_6$ .

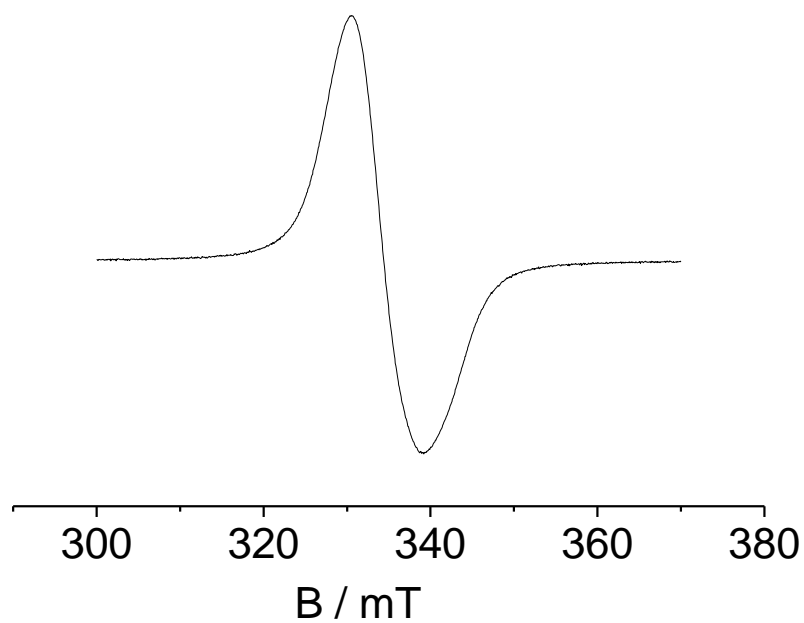

**Figure S3.** X-band EPR spectrum of electrochemically generated  $\mathbf{1}^-$  at 110 K in  $\text{CH}_2\text{Cl}_2/0.1$   
M  $\text{Bu}_4\text{NPF}_6$ .

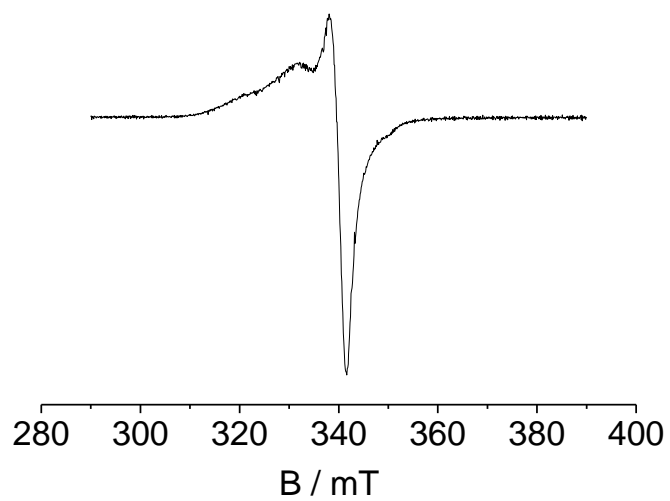

**Figure S4.** Representations of the frontier orbitals of complex **1**.

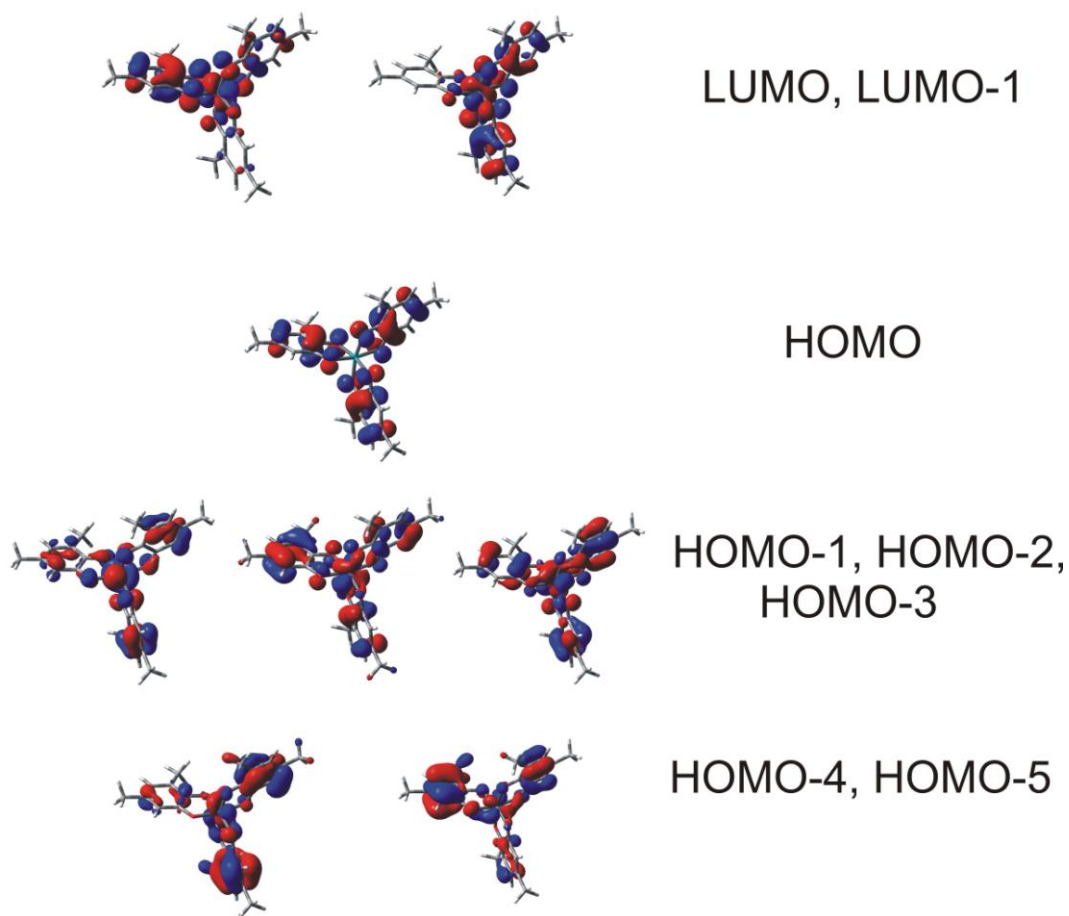

**Figure S5.** UV-vis-NIR spectroelectrochemical response of **4** in  $\text{CH}_2\text{Cl}_2/0.1 \text{ M Bu}_4\text{NPF}_6$ .

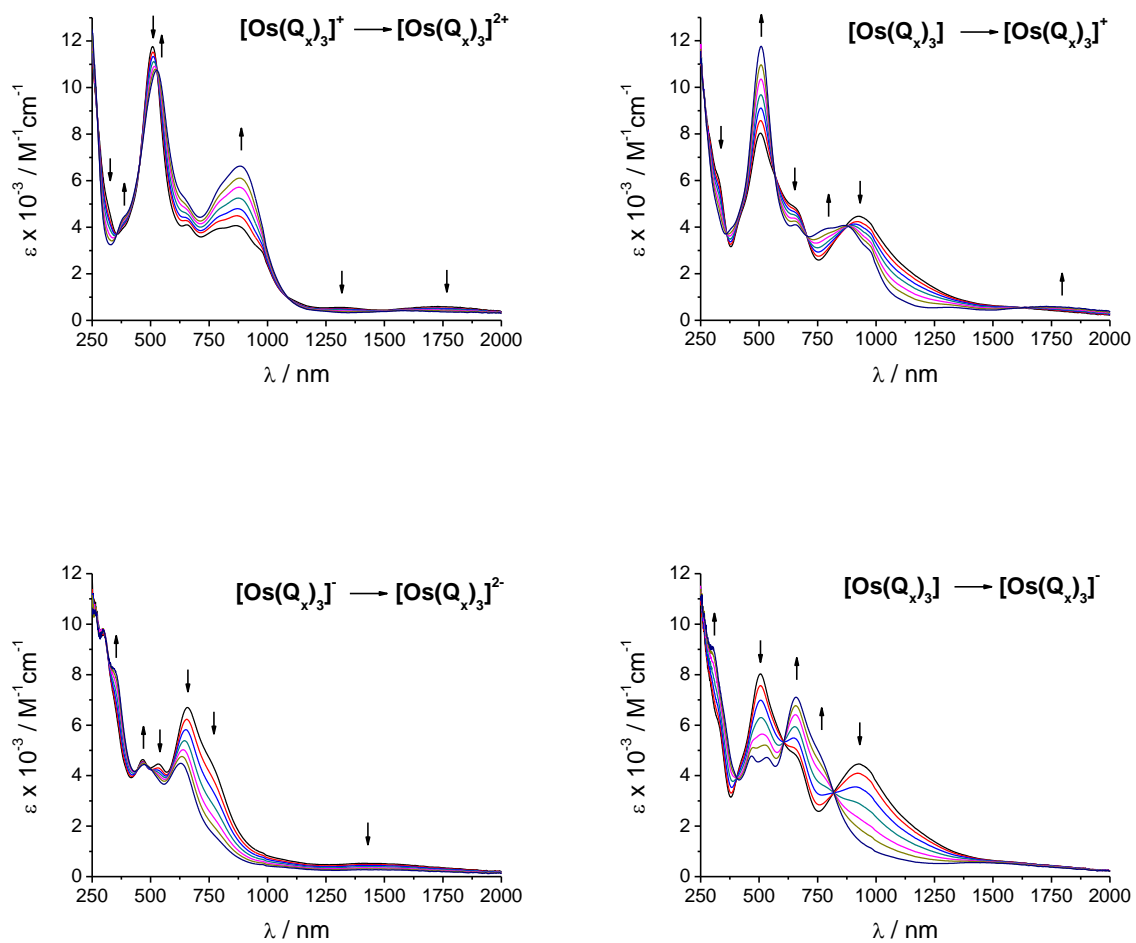

Supplement: c2dt30846k.pdf [file c2dt30846k.pdf]
